# Supplementary figures and images for: Synthesis and characterization of poly(methyl silsesquioxane)–titania optical thin films
Source: Royal Society of Chemistry journal article supplement (doi:10.1039/b207390k), 2002-01-01

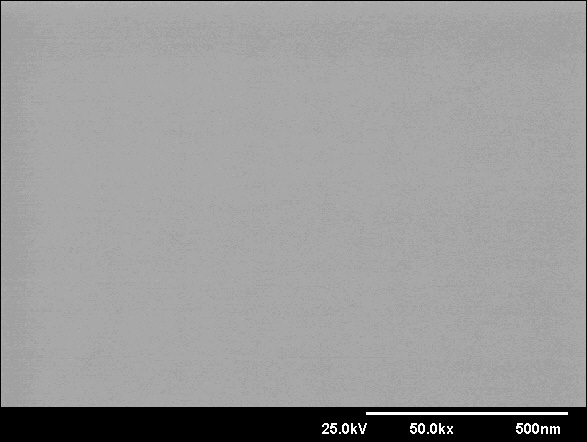

Supplement: b207390k.doc [file b207390k.doc]
